# Supplementary material for: Characterization of RON protein isoforms in pancreatic cancer: implications for biology and therapeutics
Source: PubMed Central journal article supplement (PMC5216774; doi:10.18632/oncotarget.10009), 2016-06-14
Supplement: oncotarget-07-45959-s001.pdf [file oncotarget-07-45959-s001.pdf]

## Characterization of RON protein isoforms in pancreatic cancer: implications for biology and therapeutics

### SUPPLEMENTARY FIGURES AND TABLES

#### Sequence 500-4F

GACATTTAGGTGACTATAGAATACAGCGGCCGCGAGCTCGGGCCCCACACGTGTGGTCTAGAGCTAGCCTA  
 GGCTCGAGAAGCTTGTGACGAATTCAGATT**GTGGGTATCAACGTGACCGT**GGGTGGTGTAGAGCTGCCAGC  
 ACGAGTTCGGGGGGACATGGTTGTCTGCCCCCTGCCCCCATCCCTGCAGCTTGGCCAGGATGGTGCCCCA  
 TTGCAGGCTCTGCGTAGATGGTGAATGTCATATCCTGGGTAGAGTGGTGCGGCCAGGGCCAGATGGGGTCCC  
 ACAGAGCACGCTCCTTGGTATCCTGCTGCCCTTGTGCTGCTGT**T**GTGGCTGCACTGGCGACTGCACTGGTCT  
 TCAGTACTGGTGGCGGAGGAAGCAGCTAGTTCCTCCCAACCTGAATGACCTGGCATCCCTGGACCAG  
 ACTGCTGGAGCCACACCCCTGCCTATTCTGTACTCGGGCTCTGACTACAGAAGTGGCCTTG**GTGAGATAGT**  
**GGAGGCATGAGAAGCTAAAGCCACCCCTGTCCCTACAAGCTCCTCATTCCCTCTCCCCACAGCACTCCCT**  
**GCCATTGATGGT**AATCACGAATTCGGATCCGATACGTAACGCGTCTGCAGCATGCGTGGTACCGAGCTTT  
 CCCTATAGTGAGTGTATTAGAGCTTGGCGTAATCATGGTCATAGCTGTTTCCTGTGTGAAATTGTTATCC  
 GCTCACAAATCCACACAACATACGAGCCGGAAGCATAAAGTGTAAAGCCTGGGGTGCCTAATGAGTGAGCT  
 AACTCACATTAATTGCGTTGCGCTCACTGCCCGCTTTCCAGTCGGGAAACCTGTCGTGCCAGCTGCATTAA  
 TGAATCGGCCAACGCGCGGGGAGAGGCGGTTTGCCTATTGGGCGCTCTTCCGCTTCCCTCGCTCACTGACTC  
 GCTGCGCTCGGTTCGTTTCGGCTGCGGCGAGCGGTATCAGCTCACTCAAAGGCGGTAATACGGTTATCCACAG  
 AATCAAGGGATAACCGAGGAAAAGAACATGTGAGCAAAAGGCCAACAAAAGGCCAGGAAACCGTAAAAAAG  
 GCCGCGTTGCTGGCGTTTTTTCCATAGGCTTCCCCCCTTGACGAGCATCAACAAAAAATCACCCCTCAA  
 GTTCAAAAAGTTGGCGAAAACCAACGGGAATTATAAAAAATACCAGGGCTTTTTCCCCCTTGAAAGTTCC  
 CTTGTTGGCCCTCTCCTTTTTCCCCAACCTTCCCCCTTACCCCGAAACCTTTTTCCCCCTTTTCTC  
 CCCTTCCGAAAAGGGGGGGCCCTTTTTTTCTAAAGCCCTCACCCTTTTTAGGGTTT

**Bold – Primers**

**Yellow Highlight – T wild type, mutated to C in other sequencing samples**

**Green Highlight – intron 13 insertion**

Supplementary Figure S1: Sequencing of intron 13 insertion from PCR products.

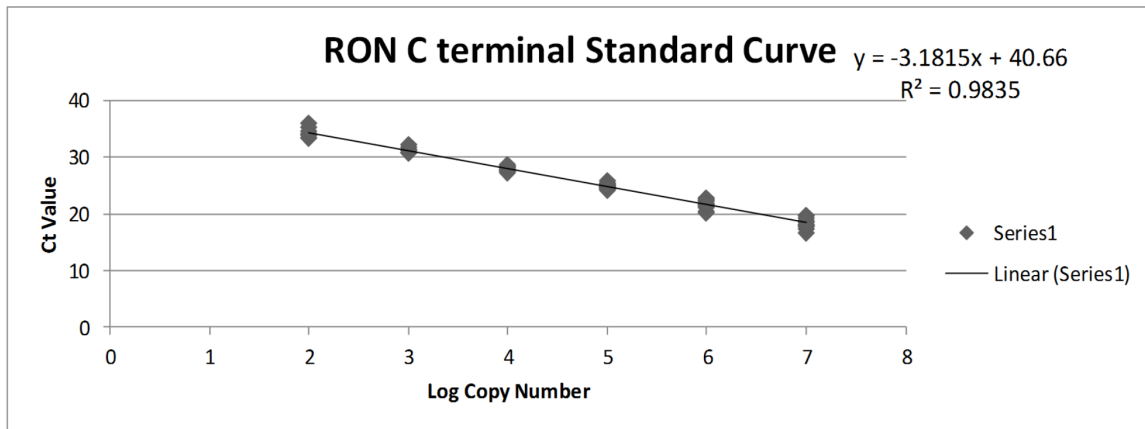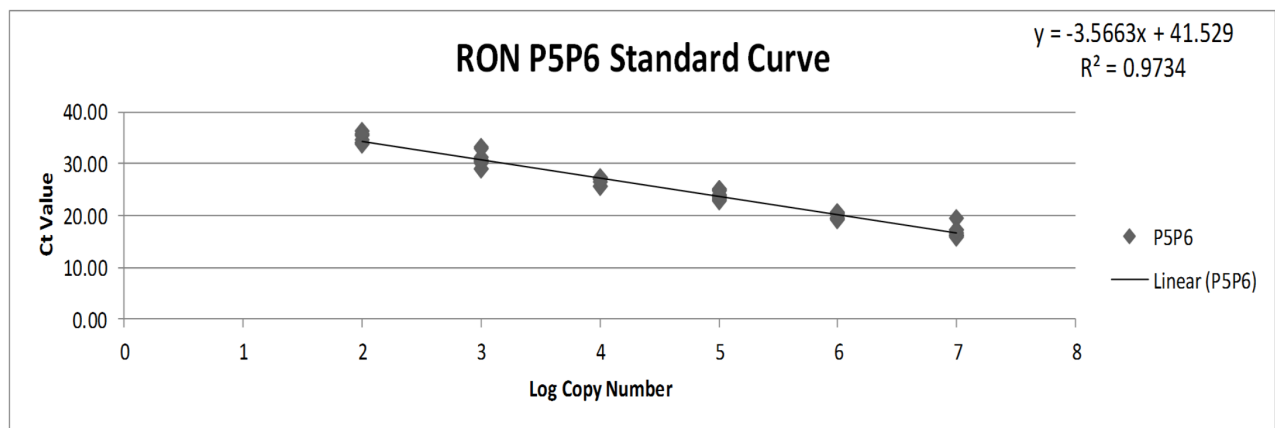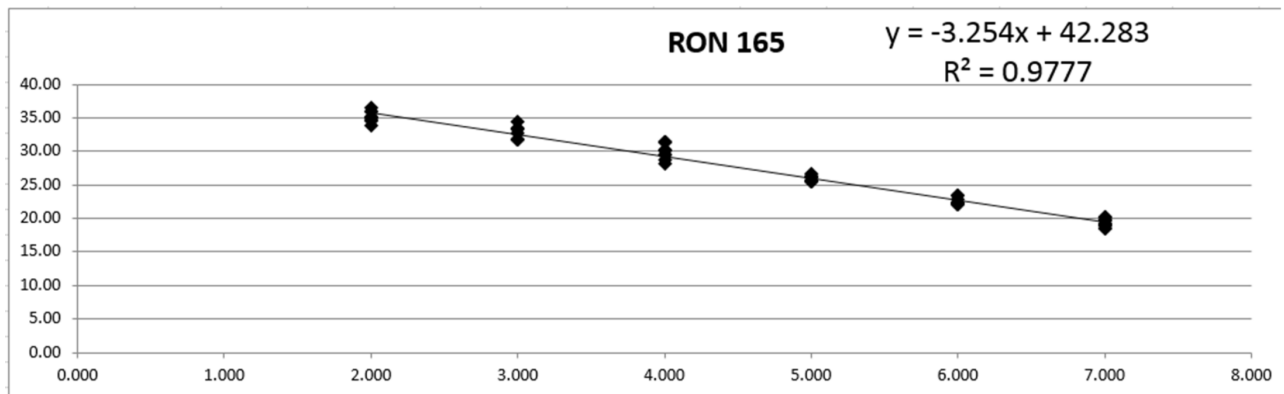

Supplementary Figure S2: Primer specific standard curves used for absolute quantitative PCR.

**A**

HPDE 20x

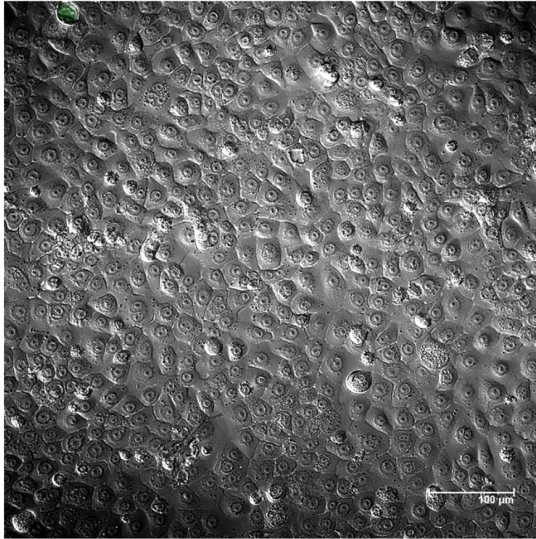

HPDEΔ165e 20x

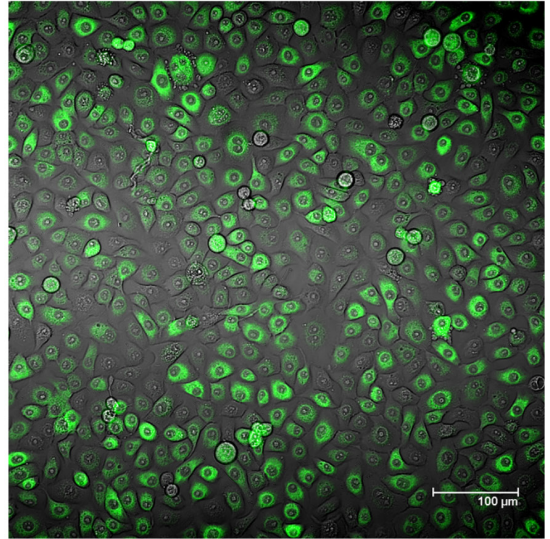

**B**

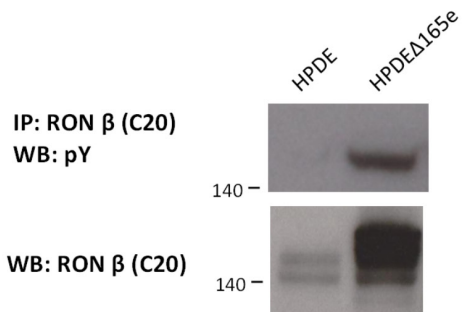

**Supplementary Figure S3: A.** RONΔ165 does not alter cell morphology when expressed in HPDE cells. **B.** HPDEΔ165 is constitutively active.

**A**

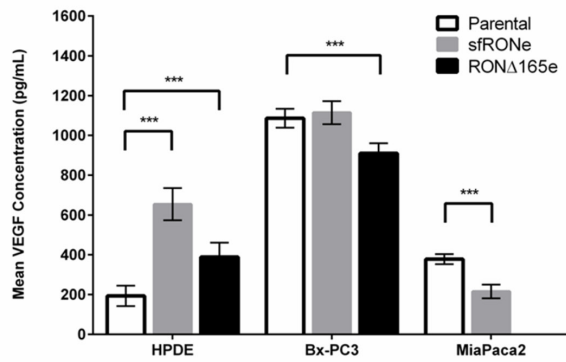

**B**

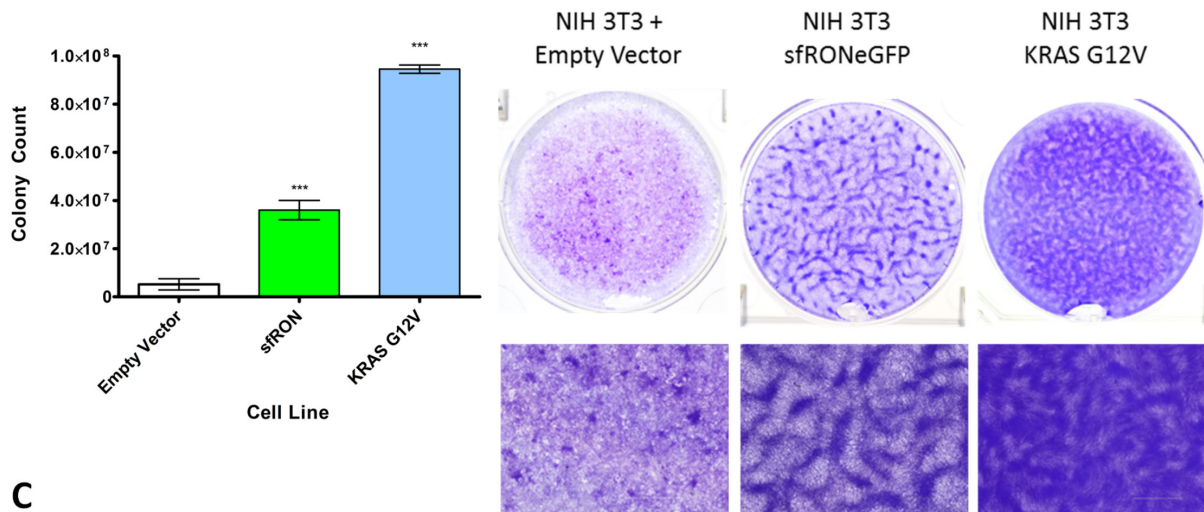

**C**

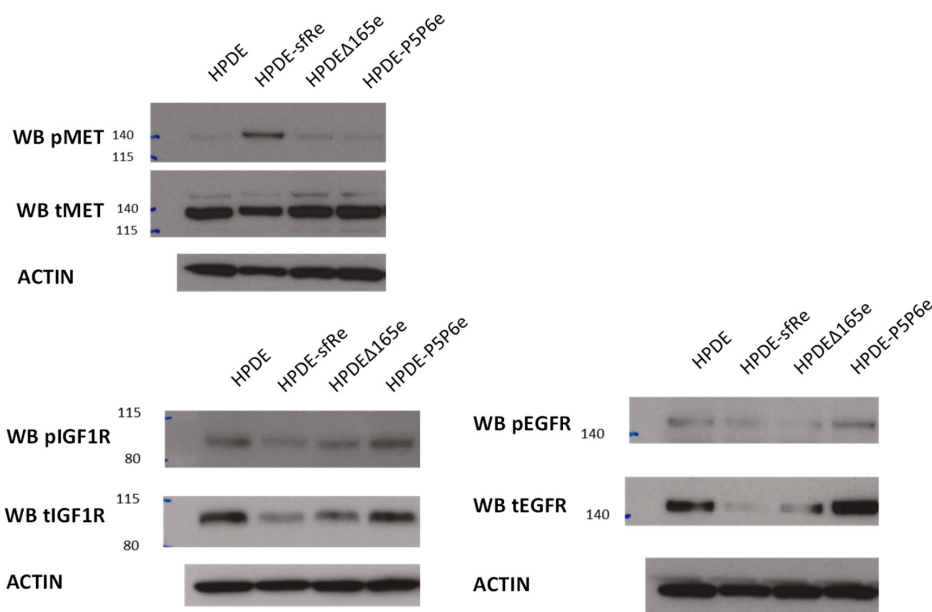

**Supplementary Figure S4:** A. VEGF secretion as a result of sfRON and RON $\Delta$ 165 expression in 3 separate pancreatic cell lines. B. Cell transformation assay using NIH 3T3 cells shows increased colony formation with sfRON expression however not as much as KRAS G12V expression. C. RON isoform expression induces phosphorylation of MET but not IGF1R and EGFR.

**A**

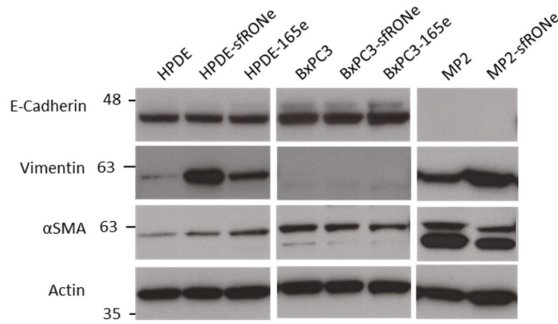

**B**

| <i>RONΔ165 (HPDE-165e) vs inactive RON (HPDE)</i> | Gene Expression Fold Change | Raw p-value | False Discovery Rate |
|---------------------------------------------------|-----------------------------|-------------|----------------------|
| <b><i>CDH1 (e-cadherin)</i></b>                   | -1.3809                     | 0.0055      | 0.0244               |
| <b><i>CDH2 (n-cadherin)</i></b>                   | 3.2848                      | 3.00E-06    | 3.14E-05             |
| <b><i>ACTA2 (alpha SMA)</i></b>                   | -2.2885                     | 1.68E-10    | 4.24E-09             |
| <b><i>VIM (Vimentin)</i></b>                      | 1.8141                      | 3.46E-07    | 4.43E-06             |
| <b><i>SNAI1(Snail)</i></b>                        | 1.3664                      | 0.1397      | 0.3637               |
| <b><i>SNAI2(Slug)</i></b>                         | -1.0188                     | 0.8764      | 1                    |
| <b><i>ZEB1</i></b>                                | 7.4332                      | 0.0008      | 0.0043               |
| <b><i>TWIST1</i></b>                              | 1.1437                      | 0.4348      | 0.822                |
| <b><i>KHDRBS1 (Sam68)</i></b>                     | 1.5346                      | 0.0002      | 0.0015               |

GFP E-Cadherin DAPI

E-

**C**

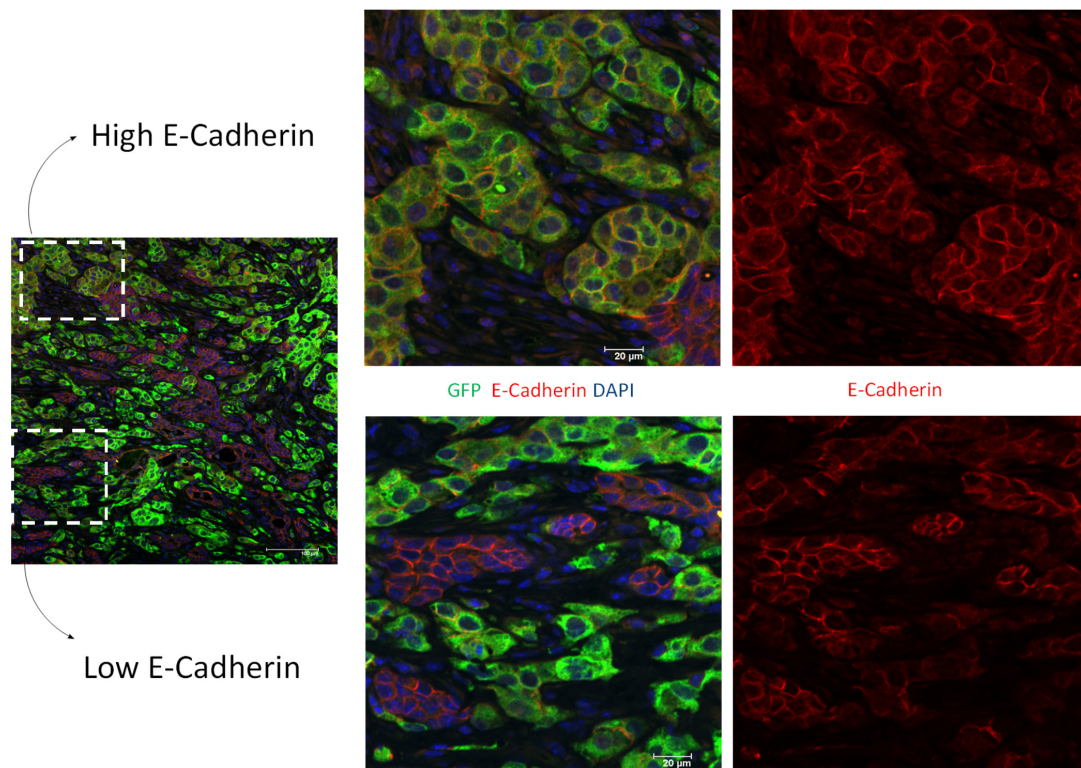

**Supplementary Figure S5:** A. Short form RON has been implicated in epithelial to mesenchymal transition in other cancer types but did not induce a switch in pancreatic cancer cell lines. B. Differential gene expression using RNA-seq comparing HPDE $\Delta$ 165 to HPDE cell lines showed no evidence of epithelial to mesenchymal transition. C. Tumors showed differential expression of E-cadherin and cell morphology. Short form RON expressing cells in the tumor had areas of high E-Cadherin and round morphology (Top panels) and areas of low E-Cadherin and more mesenchymal morphology (bottom panels, arrow).

**A**

| ID                 | Condition               | Treatment            |
|--------------------|-------------------------|----------------------|
| Sample_HDPE_1      | Inactive RON            | Control              |
| Sample_HPDE_2      | Inactive RON            | Control              |
| Sample_HPDE_3      | Inactive RON            | Control              |
| Sample_HPDE+MSP_1  | Active full length RON  | MSP stimulation      |
| Sample_HPDE+MSP_2  | Active full length RON  | MSP stimulation      |
| Sample_HPDE+MSP_3  | Active full length RON  | MSP stimulation      |
| Sample_HPDE-165_1  | Active 165 RON isoform  | 165 overexpression   |
| Sample_HPDE-165_2  | Active 165 RON isoform  | 165 overexpression   |
| Sample_HPDE-165_3  | Active 165 RON isoform  | 165 overexpression   |
| Sample_HPDE-P5P6_1 | Active P5P6 RON isoform | P5P6 overexpression  |
| Sample_HPDE-P5P6_2 | Active P5P6 RON isoform | P5P6 overexpression  |
| Sample_HPDE-P5P6_3 | Active P5P6 RON isoform | P5P6 overexpression  |
| Sample_HPDE-sfRON1 | Active sfRON isoform    | sfRON overexpression |
| Sample_HPDE-sfRON2 | Active sfRON isoform    | sfRON overexpression |
| Sample_HPDE-sfRON3 | Active sfRON isoform    | sfRON overexpression |

← Removed from analysis due to not passing QC

**B**

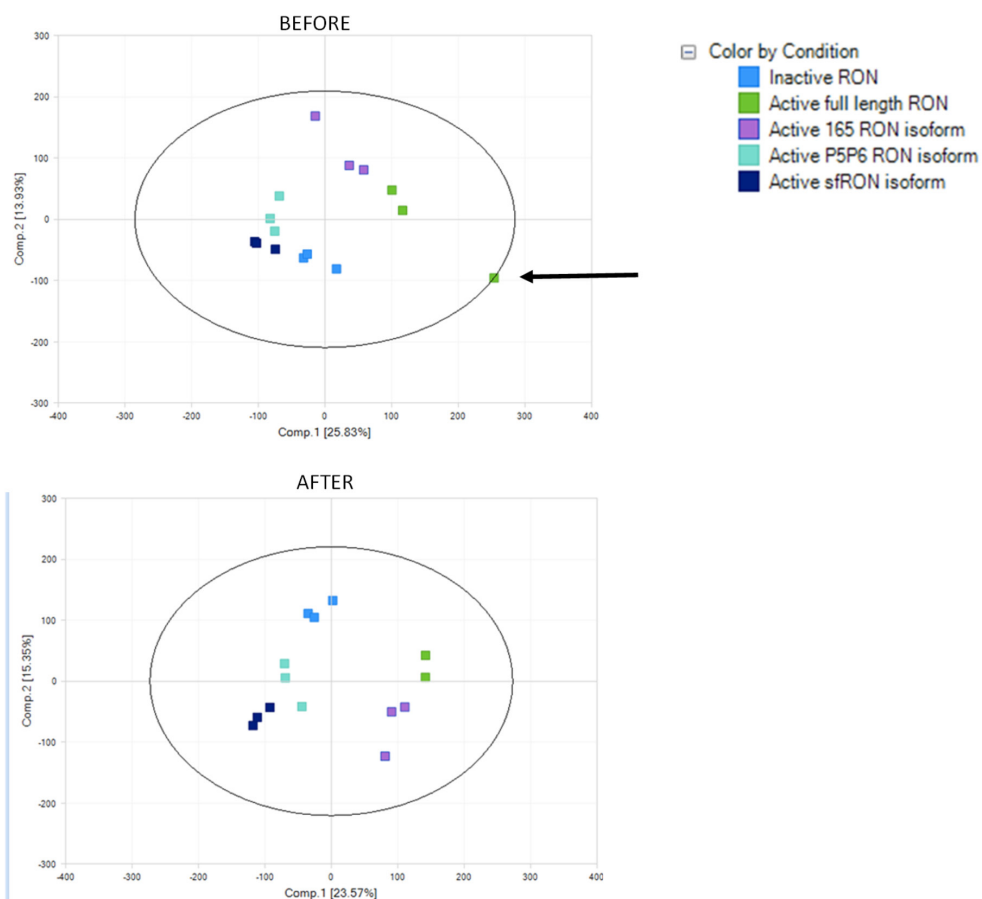

**Supplementary Figure S6: A.** One sample out of 3 HPDE cells stimulated with MSP was removed from the data analysis. **B.** This sample did not pass quality control and was an outlier on principal control analysis.

**A** Activated RON Pathways Upregulated

| Category        | Term                                         | Count | %    | P-Value | Benjamini |
|-----------------|----------------------------------------------|-------|------|---------|-----------|
| GOTERM_BP_FAT   | ncRNA processing                             | 22    | 5.7  | 6.4E-11 | 1.0E-7    |
| SP_PIR_KEYWORDS | ribosome biogenesis                          | 12    | 3.1  | 8.4E-10 | 3.1E-7    |
| SP_PIR_KEYWORDS | phosphoprotein                               | 188   | 48.7 | 3.4E-9  | 6.1E-7    |
| GOTERM_BP_FAT   | ribonucleoprotein complex biogenesis         | 19    | 4.9  | 1.0E-8  | 8.2E-6    |
| GOTERM_BP_FAT   | ribosome biogenesis                          | 16    | 4.1  | 1.1E-8  | 5.9E-6    |
| GOTERM_BP_FAT   | ncRNA metabolic process                      | 20    | 5.2  | 8.6E-8  | 3.6E-5    |
| GOTERM_CC_FAT   | nucleolus                                    | 37    | 9.6  | 1.1E-7  | 2.9E-5    |
| GOTERM_CC_FAT   | nuclear lumen                                | 57    | 14.8 | 4.9E-7  | 6.6E-5    |
| GOTERM_BP_FAT   | RNA processing                               | 30    | 7.8  | 6.2E-7  | 2.0E-4    |
| GOTERM_CC_FAT   | intracellular non-membrane-bounded organelle | 84    | 21.8 | 1.4E-6  | 1.3E-4    |
| GOTERM_CC_FAT   | non-membrane-bounded organelle               | 84    | 21.8 | 1.4E-6  | 1.3E-4    |
| INTERPRO        | Tubulin/FtsZ, GTPase domain                  | 7     | 1.8  | 4.5E-6  | 2.9E-3    |
| GOTERM_BP_FAT   | rRNA processing                              | 11    | 2.8  | 9.8E-6  | 2.7E-3    |
| GOTERM_BP_FAT   | rRNA metabolic process                       | 11    | 2.8  | 1.4E-5  | 3.4E-3    |
| SP_PIR_KEYWORDS | rrna processing                              | 9     | 2.3  | 1.5E-5  | 1.8E-3    |
| GOTERM_CC_FAT   | intracellular organelle lumen                | 60    | 15.5 | 2.9E-5  | 2.0E-3    |
| SP_PIR_KEYWORDS | trna processing                              | 9     | 2.3  | 3.0E-5  | 2.8E-3    |
| GOTERM_BP_FAT   | protein polymerization                       | 8     | 2.1  | 3.7E-5  | 7.5E-3    |
| INTERPRO        | Tubulin/FtsZ, 2-layer sandwich domain        | 6     | 1.6  | 4.8E-5  | 1.5E-2    |
| GOTERM_CC_FAT   | organelle lumen                              | 60    | 15.5 | 5.7E-5  | 3.1E-3    |
| INTERPRO        | Tubulin, conserved site                      | 6     | 1.6  | 6.0E-5  | 1.3E-2    |
| PIR_SUPERFAMILY | PIRSF002306:tubulin                          | 6     | 1.6  | 6.2E-5  | 1.0E-2    |
| INTERPRO        | Tubulin                                      | 6     | 1.6  | 7.5E-5  | 1.2E-2    |
| GOTERM_BP_FAT   | tRNA processing                              | 9     | 2.3  | 9.7E-5  | 1.8E-2    |
| GOTERM_CC_FAT   | membrane-enclosed lumen                      | 60    | 15.5 | 1.0E-4  | 4.5E-3    |
| GOTERM_CC_FAT   | nucleolar part                               | 6     | 1.6  | 1.6E-4  | 6.3E-3    |
| GOTERM_CC_FAT   | small nucleolar ribonucleoprotein complex    | 5     | 1.3  | 5.6E-4  | 1.9E-2    |

(Continued)

## sFRON Expression Pathways Upregulated

| Category        | Term                                     | Count | %    | P-Value | Benjamini |
|-----------------|------------------------------------------|-------|------|---------|-----------|
| SP_PIR_KEYWORDS | signal                                   | 125   | 31.7 | 2.9E-14 | 1.2E-11   |
| UP_SEQ_FEATURE  | signal peptide                           | 125   | 31.7 | 4.7E-14 | 6.3E-11   |
| GOTERM_CC_FAT   | extracellular region part                | 56    | 14.2 | 1.7E-12 | 4.7E-10   |
| GOTERM_CC_FAT   | extracellular space                      | 44    | 11.2 | 3.9E-11 | 5.3E-9    |
| GOTERM_CC_FAT   | extracellular region                     | 84    | 21.3 | 6.0E-11 | 5.5E-9    |
| SP_PIR_KEYWORDS | Secreted                                 | 74    | 18.8 | 1.2E-10 | 2.3E-8    |
| SP_PIR_KEYWORDS | developmental protein                    | 45    | 11.4 | 3.7E-10 | 4.9E-8    |
| SP_PIR_KEYWORDS | cytokine                                 | 20    | 5.1  | 3.5E-9  | 3.4E-7    |
| SP_PIR_KEYWORDS | glycoprotein                             | 134   | 34.0 | 1.2E-8  | 9.7E-7    |
| GOTERM_MF_FAT   | cytokine activity                        | 19    | 4.8  | 1.0E-7  | 5.2E-5    |
| UP_SEQ_FEATURE  | glycosylation site:N-linked (GlcNAc...)  | 126   | 32.0 | 1.8E-7  | 1.2E-4    |
| GOTERM_BP_FAT   | locomotory behavior                      | 21    | 5.3  | 8.7E-7  | 1.5E-3    |
| GOTERM_BP_FAT   | behavior                                 | 28    | 7.1  | 1.2E-6  | 1.1E-3    |
| UP_SEQ_FEATURE  | DNA-binding region:Homeobox              | 17    | 4.3  | 1.4E-6  | 6.1E-4    |
| GOTERM_BP_FAT   | immune response                          | 34    | 8.6  | 4.5E-6  | 2.7E-3    |
| GOTERM_BP_FAT   | taxis                                    | 15    | 3.8  | 5.0E-6  | 2.2E-3    |
| GOTERM_BP_FAT   | chemotaxis                               | 15    | 3.8  | 5.0E-6  | 2.2E-3    |
| INTERPRO        | Homeobox, conserved site                 | 18    | 4.6  | 5.9E-6  | 3.9E-3    |
| SP_PIR_KEYWORDS | Homeobox                                 | 18    | 4.6  | 6.9E-6  | 4.5E-4    |
| INTERPRO        | Homeobox                                 | 18    | 4.6  | 7.0E-6  | 2.3E-3    |
| GOTERM_BP_FAT   | defense response                         | 31    | 7.9  | 8.7E-6  | 3.1E-3    |
| SP_PIR_KEYWORDS | disulfide bond                           | 90    | 22.8 | 1.4E-5  | 7.7E-4    |
| SP_PIR_KEYWORDS | pharmaceutical                           | 8     | 2.0  | 2.3E-5  | 1.1E-3    |
| INTERPRO        | Homeodomain-related                      | 17    | 4.3  | 3.2E-5  | 7.0E-3    |
| UP_SEQ_FEATURE  | disulfide bond                           | 86    | 21.8 | 4.1E-5  | 1.4E-2    |
| SP_PIR_KEYWORDS | angiogenesis                             | 9     | 2.3  | 4.6E-5  | 2.0E-3    |
| SP_PIR_KEYWORDS | chemotaxis                               | 9     | 2.3  | 8.6E-5  | 3.4E-3    |
| SMART           | HOX                                      | 18    | 4.6  | 1.0E-4  | 1.7E-2    |
| INTERPRO        | Small chemokine, C-X-C                   | 5     | 1.3  | 1.1E-4  | 1.7E-2    |
| KEGG_PATHWAY    | Cytokine-cytokine receptor interaction   | 17    | 4.3  | 1.1E-4  | 1.3E-2    |
| GOTERM_BP_FAT   | inflammatory response                    | 19    | 4.8  | 1.2E-4  | 3.6E-2    |
| INTERPRO        | Small chemokine, C-X-C/Interleukin 8     | 5     | 1.3  | 1.5E-4  | 1.9E-2    |
| GOTERM_BP_FAT   | positive regulation of T cell activation | 9     | 2.3  | 1.5E-4  | 3.8E-2    |
| GOTERM_BP_FAT   | regulation of locomotion                 | 14    | 3.6  | 1.6E-4  | 3.4E-2    |
| INTERPRO        | Small chemokine, interleukin-8-like      | 7     | 1.8  | 1.7E-4  | 1.8E-2    |
| PIR_SUPERFAMILY | PIRSF002522:CXC chemokine                | 5     | 1.3  | 2.0E-4  | 3.6E-2    |
| GOTERM_CC_FAT   | proteinaceous extracellular matrix       | 18    | 4.6  | 3.3E-4  | 2.2E-2    |
| SP_PIR_KEYWORDS | extracellular matrix                     | 15    | 3.8  | 3.3E-4  | 1.2E-2    |

(Continued)



sfRON Expression Pathways Downregulated

| Category        | Term                                                      | Count | %    | P-Value | Benjamini |
|-----------------|-----------------------------------------------------------|-------|------|---------|-----------|
| SP_PIR_KEYWORDS | <a href="#">Secreted</a>                                  | 61    | 23.5 | 6.6E-13 | 2.2E-10   |
| GOTERM_CC_1     | <a href="#">extracellular region</a>                      | 64    | 24.6 | 2.5E-10 | 2.7E-9    |
| SP_PIR_KEYWORDS | <a href="#">signal</a>                                    | 83    | 31.9 | 9.6E-10 | 1.6E-7    |
| UP_SEQ_FEATURE  | <a href="#">signal peptide</a>                            | 83    | 31.9 | 1.3E-9  | 1.2E-6    |
| GOTERM_CC_1     | <a href="#">extracellular region part</a>                 | 36    | 13.8 | 1.6E-7  | 8.9E-7    |
| GOTERM_BP_ALL   | <a href="#">epidermis development</a>                     | 15    | 5.8  | 2.0E-7  | 2.8E-4    |
| GOTERM_BP_ALL   | <a href="#">ectoderm development</a>                      | 15    | 5.8  | 5.3E-7  | 3.6E-4    |
| GOTERM_BP_ALL   | <a href="#">tissue development</a>                        | 25    | 9.6  | 1.1E-5  | 5.1E-3    |
| SP_PIR_KEYWORDS | <a href="#">glycoprotein</a>                              | 87    | 33.5 | 1.6E-5  | 1.7E-3    |
| UP_SEQ_FEATURE  | <a href="#">short sequence motif:Cell attachment site</a> | 9     | 3.5  | 2.2E-5  | 9.5E-3    |
| GOTERM_MF_ALL   | <a href="#">calcium ion binding</a>                       | 29    | 11.2 | 5.1E-5  | 2.1E-2    |
| GOTERM_BP_ALL   | <a href="#">organ development</a>                         | 44    | 16.9 | 5.4E-5  | 1.8E-2    |
| GOTERM_BP_ALL   | <a href="#">system development</a>                        | 54    | 20.8 | 5.8E-5  | 1.6E-2    |
| SP_PIR_KEYWORDS | <a href="#">calcium</a>                                   | 26    | 10.0 | 6.2E-5  | 5.1E-3    |
| UP_SEQ_FEATURE  | <a href="#">glycosylation site:N-linked (GlcNAc...)</a>   | 82    | 31.5 | 7.1E-5  | 2.1E-2    |
| SP_PIR_KEYWORDS | <a href="#">extracellular matrix</a>                      | 13    | 5.0  | 8.8E-5  | 5.7E-3    |

RONΔ165 Expression

446 Genes Pathways Upregulated

| Category        | Term                                                                    | Count | %    | P-Value | Benjamini |
|-----------------|-------------------------------------------------------------------------|-------|------|---------|-----------|
| UP_SEQ_FEATURE  | <a href="#">region of interest:Beta</a>                                 | 5     | 1.1  | 4.1E-5  | 5.3E-2    |
| UP_SEQ_FEATURE  | <a href="#">region of interest:Alpha</a>                                | 5     | 1.1  | 4.1E-5  | 5.3E-2    |
| SP_PIR_KEYWORDS | <a href="#">phosphoprotein</a>                                          | 197   | 44.3 | 4.3E-5  | 1.6E-2    |
| UP_SEQ_FEATURE  | <a href="#">metal ion-binding site:Divalent metal cation; cluster A</a> | 5     | 1.1  | 6.3E-5  | 4.1E-2    |
| UP_SEQ_FEATURE  | <a href="#">metal ion-binding site:Divalent metal cation; cluster B</a> | 5     | 1.1  | 6.3E-5  | 4.1E-2    |
| INTERPRO        | <a href="#">Metallothionein, vertebrate, metal binding site</a>         | 5     | 1.1  | 6.6E-5  | 4.5E-2    |
| PIR_SUPERFAMILY | <a href="#">PIRSF002564:metallothionein</a>                             | 5     | 1.1  | 6.7E-5  | 1.2E-2    |
| SP_PIR_KEYWORDS | <a href="#">metal-thiolate cluster</a>                                  | 5     | 1.1  | 9.2E-5  | 1.7E-2    |
| INTERPRO        | <a href="#">Metallothionein, vertebrate</a>                             | 5     | 1.1  | 9.8E-5  | 3.3E-2    |
| INTERPRO        | <a href="#">Metallothionein superfamily, eukaryotic</a>                 | 5     | 1.1  | 9.8E-5  | 3.3E-2    |
| INTERPRO        | <a href="#">WD40 repeat 2</a>                                           | 16    | 3.6  | 1.4E-4  | 3.2E-2    |
| INTERPRO        | <a href="#">WD40 repeat, region</a>                                     | 16    | 3.6  | 2.5E-4  | 4.2E-2    |
| INTERPRO        | <a href="#">WD40 repeat, subgroup</a>                                   | 16    | 3.6  | 3.0E-4  | 4.0E-2    |

234 Genes Pathways Downregulated

None significant

(Continued)

RON P5P6 Expression

564 Genes Pathways  
Upregulated

| Category        | Term                           | Count | %    | P-Value | Benjamini |
|-----------------|--------------------------------|-------|------|---------|-----------|
| SP_PIR_KEYWORDS | <a href="#">phosphoprotein</a> | 253   | 44.9 | 1.6E-5  | 6.2E-3    |

205 Genes Pathways  
Downregulated

| Term            | RT                                                   | %  | P-Value | Benjamini | Benjamini |
|-----------------|------------------------------------------------------|----|---------|-----------|-----------|
| SP_PIR_KEYWORDS | <a href="#">developmental protein</a>                | 25 | 12.9    | 2.4E-7    | 6.0E-5    |
| GOTERM_BP_ALL   | <a href="#">regionalization</a>                      | 13 | 6.7     | 4.4E-7    | 5.3E-4    |
| GOTERM_BP_ALL   | <a href="#">pattern specification process</a>        | 14 | 7.2     | 1.8E-6    | 1.1E-3    |
| GOTERM_BP_ALL   | <a href="#">skeletal system development</a>          | 15 | 7.7     | 2.4E-6    | 9.8E-4    |
| GOTERM_BP_ALL   | <a href="#">multicellular organismal development</a> | 52 | 26.8    | 2.5E-6    | 7.7E-4    |
| SP_PIR_KEYWORDS | <a href="#">Secreted</a>                             | 36 | 18.6    | 4.6E-6    | 5.8E-4    |
| SP_PIR_KEYWORDS | <a href="#">signal</a>                               | 55 | 28.4    | 6.3E-6    | 5.3E-4    |
| UP_SEQ_FEATURE  | signal peptide                                       | 55 | 28.4    | 7.6E-6    | 5.3E-3    |
| GOTERM_BP_ALL   | <a href="#">developmental process</a>                | 54 | 27.8    | 8.0E-6    | 1.9E-3    |
| GOTERM_MF_ALL   | <a href="#">sequence-specific DNA binding</a>        | 19 | 9.8     | 1.0E-5    | 3.1E-3    |
| GOTERM_CC_ALL   | <a href="#">extracellular region</a>                 | 39 | 20.1    | 1.9E-5    | 3.5E-3    |
| GOTERM_BP_ALL   | <a href="#">system development</a>                   | 43 | 22.2    | 2.2E-5    | 4.6E-3    |
| PANTHER_BP_ALL  | BP00193:Developmental processes                      | 40 | 20.6    | 3.0E-5    | 3.2E-3    |
| GOTERM_BP_ALL   | <a href="#">embryonic development</a>                | 18 | 9.3     | 3.2E-5    | 5.6E-3    |
| GOTERM_BP_ALL   | <a href="#">embryonic morphogenesis</a>              | 13 | 6.7     | 4.1E-5    | 6.3E-3    |
| GOTERM_BP_ALL   | <a href="#">anterior/posterior pattern formation</a> | 9  | 4.6     | 6.2E-5    | 8.4E-3    |
| GOTERM_MF_ALL   | <a href="#">transcription factor activity</a>        | 23 | 11.9    | 6.9E-5    | 1.1E-2    |
| GOTERM_BP_ALL   | <a href="#">anatomical structure development</a>     | 44 | 22.7    | 7.1E-5    | 8.6E-3    |
| UP_SEQ_FEATURE  | DNA-binding region:Homeobox                          | 10 | 5.2     | 7.5E-5    | 2.5E-2    |
| SP_PIR_KEYWORDS | <a href="#">Homeobox</a>                             | 11 | 5.7     | 8.9E-5    | 5.6E-3    |
| PANTHER_BP_ALL  | BP00248:Mesoderm development                         | 17 | 8.8     | 9.1E-5    | 4.9E-3    |
| INTERPRO        | <a href="#">Homeobox, conserved site</a>             | 11 | 5.7     | 9.2E-5    | 3.5E-2    |
| INTERPRO        | <a href="#">Homeobox</a>                             | 11 | 5.7     | 1.0E-4    | 2.0E-2    |
| GOTERM_CC_ALL   | <a href="#">extracellular region part</a>            | 23 | 11.9    | 1.1E-4    | 9.6E-3    |
| SMART           | <a href="#">HOX</a>                                  | 11 | 5.7     | 2.1E-4    | 2.0E-2    |
| PANTHER_BP_ALL  | BP00201:Skeletal development                         | 8  | 4.1     | 2.4E-4    | 8.6E-3    |
| GOTERM_BP_ALL   | <a href="#">embryonic organ development</a>          | 9  | 4.6     | 2.6E-4    | 2.8E-2    |
| GOTERM_BP_ALL   | <a href="#">embryonic organ morphogenesis</a>        | 8  | 4.1     | 3.0E-4    | 3.0E-2    |
| PANTHER_BP_ALL  | BP00245:Segment specification                        | 7  | 3.6     | 4.5E-4    | 1.2E-2    |
| GOTERM_BP_ALL   | <a href="#">organ development</a>                    | 32 | 16.5    | 4.5E-4    | 4.1E-2    |
| PANTHER_BP_ALL  | BP00199:Neurogenesis                                 | 16 | 8.2     | 5.7E-4    | 1.2E-2    |
| PANTHER_BP_ALL  | BP00178:Stress response                              | 9  | 4.6     | 6.2E-4    | 1.1E-2    |

**Supplementary Figure S7: A.** DAVID gene ontology pathways significantly (FDR 0.05) up and down regulated when full length RON, sfRON, RONΔ165, or RON P5P6 is expressed.

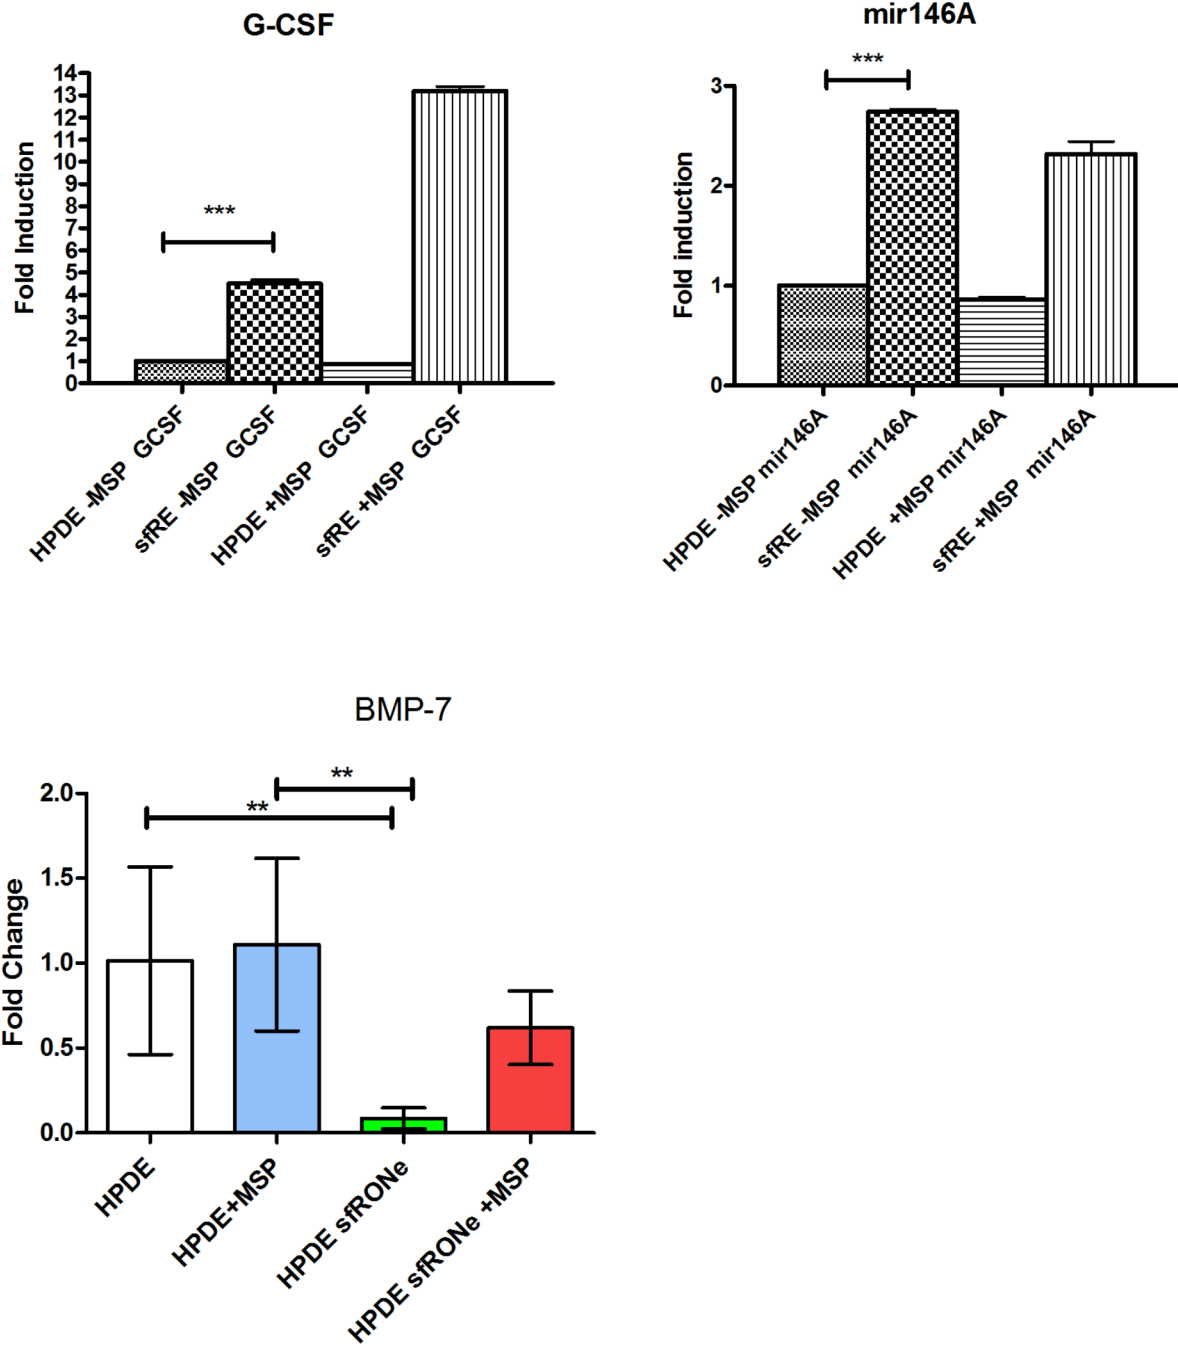

Supplementary Figure S8: RT-PCR of 3 genes which validate that mir146a and G-CSF are upregulated, and BMP-7 downregulated in sfRON expressing cells.

**Supplementary Table S1: Primers used for end point and quantitative PCR**

| Primer                                                                                  | Forward                  | Reverse                 |
|-----------------------------------------------------------------------------------------|--------------------------|-------------------------|
| <b>Wild type RON</b>                                                                    | TAGTGTCTGCACTGCTTGGG     | GCTGTTCTGGACGCACATTC    |
| <b>Exon 4-7</b>                                                                         | GGCATGGCATTTCATGGGCT     | AGAGTCTGTCTGTAGGCACC    |
| <b>Exon 10-12</b>                                                                       | TGCCGCCTTCTGAATATGT      | TCCTTGGTATCCTGCTGCCT    |
| <b>Exon 11 deletion specific (RON<math>\Delta</math>165, RON<math>\Delta</math>155)</b> | GATGGGTGGCAGGGAATCTG     | CCATCTACGCAGACCTCAAAC   |
| <b>Short-form RON specific (RON<math>\Delta</math>55)</b>                               | GACCCTCTCTGCAGTATATTGGG  | CCATCTACGCAGACCTGCAA    |
| <b>C-terminal deletion (RON<math>\Delta</math>170)</b>                                  | CTGATGTGGTACCAAGTGATGC   | TGGCAGCTGCACATAATGGT    |
| <b>Intron 13 Insertion</b>                                                              | GAGGAGCATGCCATTAAGTTTGA  | GTCCAGCATGCAGTCCGC      |
| <b>Partial exon 5, Partial exon 6 deletion (P5P6)</b>                                   | GGCAGTACAAGGCCTACCAA     | TCAGTCCCATTGACCAGCAC    |
| <b>Actin</b>                                                                            | AATGTGGCCGACGACTTTGATTGC | AGGATGGCAAGGGACTTCTGTAA |

**Supplementary Table S2: Activity of compounds BMS777607 and LDC047896 tested at 1  $\mu$ M across a panel of 240 different kinases.** Data are expressed as % effect response versus each kinase tested at its respective  $K_m$  for ATP; %inhibition = %effect \* (-1). Profiling of compounds has been performed at Merck Millipore, Germany.

See Supplementary File 1
